# Supplementary material for: Development of a humanized mouse model with functional human materno-fetal interface immunity
Source: JCI journal article supplement (doi:10.1172/jci.insight.176527), 2024-10-22
Supplement: sd1 [file 1]

1 **Supplementary Information**

2 **Development of a humanized mouse model with functional human maternal–**  
3 **fetal interface immunity**

4 Shuai Dong<sup>1,2</sup>, Cong Fu<sup>1,2</sup>, Chang Shu<sup>1</sup>, Min Xie<sup>1,2</sup>, Yan Li<sup>1,2</sup>, Jun Zou<sup>1,2</sup>, Yi-Zi  
5 Meng<sup>1,2</sup>, Peng Xu<sup>1,2</sup>, Yan-Hong Shan<sup>1</sup>, Hui-Min Tian<sup>1,2</sup>, Jin He<sup>1\*</sup>, Yong-Guang  
6 Yang<sup>1,2,3\*</sup>, Zheng Hu<sup>1,2\*</sup>

7 <sup>1</sup>Key Laboratory of Organ Regeneration & Transplantation of Ministry of Education,  
8 Department of obstetrics, Obstetrics and Gynaecology Center, The First Hospital  
9 of Jilin University, China

10 <sup>2</sup>National-Local Joint Engineering Laboratory of Animal Models for Human  
11 Diseases, China

12 <sup>3</sup>International Center of Future Science, Jilin University, China

13 \* **Corresponding author:** Zheng Hu, Yong-Guang Yang, Jin He

14 **Address correspondence to:**

15 Zheng Hu, National-Local Joint Engineering Laboratory of Animal Models for  
16 Human Diseases, 1977 Xinzhu Rd, Changchun, Jilin, P.R. China 130062. Tel  
17 (office) +86-431-80539007. Email: [zhenghu@jlu.edu.cn](mailto:zhenghu@jlu.edu.cn).

18 Yong-Guang Yang, National-Local Joint Engineering Laboratory of Animal Models  
19 for Human Diseases, 1977 Xinzhu Rd, Changchun, Jilin, P.R. China 130062. Tel  
20 (office) +86-431-80539001. Email: [yonggg@jlu.edu.cn](mailto:yonggg@jlu.edu.cn).

21 Jin He: Department of obstetrics, The First Hospital of Jilin University, 71 Xinmin  
22 Street, Changchun, Jilin, P.R. China 130021. Tel (office) +86-431-88785201.  
23 Email: [hejin@jlu.edu.cn](mailto:hejin@jlu.edu.cn).

24 **Conflict-of-interest statement:** The authors have declared that no conflict of  
25 interest exists.

26

## **MATERIALS AND METHODS**

### **Data preprocessing with Cell Ranger and Seurat**

Single-cell sequencing data were aligned and quantified using the Cell Ranger Single-Cell Software Suite against the hg19 human reference genome. Quality of cells were then assessed based on three metrics: (1) The number of total UMI counts per cell (library size) were  $< 40000$ ; (2) The number of detected genes per cell were  $< 5000$  and  $> 500$ ; (3) The proportion of mitochondrial gene counts were  $< 20\%$ . Downstream analyses, such as normalization, clustering, differential expression analysis and visualization, were performed using “Seurat” package in R software (version 4.0.2). Cell cycle effect was considered, scored, evaluated and eliminated during normalization. Clusters were identified using the community identification algorithm as implemented in the Seurat ‘FindClusters’ function, and the resolution parameter was tuned to produce a proper number of clusters and capture most of the biological variability. tSNE analysis was performed using the RunTSNE function with default parameters. Differential expression analysis was performed based on the Wilcoxon rank-sum test.

### **Cluster specific gene identification and marker-based classification**

Based on the clusters produced, the Seurat ‘Find All Markers’ function was used to identify cluster-specific marker genes with thresholds  $p$  value  $< 0.05$ . Clusters were annotated by SingleR package, and results of 3 reference databases comparisons (Nover shtern Hematopoietic Data (1), Monaco Immune Data (2), Database Immune Cell Expression Data (3)) were combined. The first round of

clustering identified six major cell types including T and NK cells, monocyte, B cells, DC, basophils, plasmablast and progenitor cells. A second round of clustering was performed on T, NK and monocyte cells to subdivide.

## **Enrichment analysis**

To determine transcriptional signatures, R package “ClusterProfiler” (Release 3.16.1) (4) was used for functional enrichment analysis of DEGs in different cell types, and GO biological processes at the significant level ( $q\text{-value} < 0.05$ ) were employed. For heatmap representation, the Seurat ‘DoHeatmap’ function was used.

## **Cell–cell communication analysis**

CellPhoneDB v.2.0 (5) were used to infer cell-cell communication by combining expression of multi-subunit receptor-ligands complexes, default parameters were used. Cell-cell interactions heatmaps were generated using pheatmap R package.

## **Single-cell pseudotime trajectory analysis**

Pseudotime cell developmental trajectory analysis was analyzed by Monocle 2 package (v2.16.0) to explore the cell-state transitions. To analysis of cell-cell communication by interactions, we use CellPhoneDB algorithm ([www.CellPhoneDB.org](http://www.CellPhoneDB.org)) ( $p < 0.05$ ).

## **Single-cell TCR analysis**

68 TCR sequences were aligned to the GRCh38 reference genome using the 10x  
69 Genomics Cell Ranger V(D)J pipeline. Only single-cell barcodes with one or two  
70 TCR  $\alpha$  chains and one TCR  $\beta$  chain sequences and for which the transcriptome  
71 was available were kept for further analysis. Clonotypes were assigned to cells  
72 based on unique paired V-gene/CDR3/J-gene of TRA-TRB sequences.

### 73 **Integration analysis with published human data**

74 Single-cell sequencing data on the human cell composition in the decidua of E14.5  
75 HIS mice were compared with data from their human counterparts collected at 20-  
76 34 week (<https://doi.org/10.6084/m9.figshare.23264102.v1>.) through integration  
77 analysis.

78

79

## 80 Supplementary figure legends

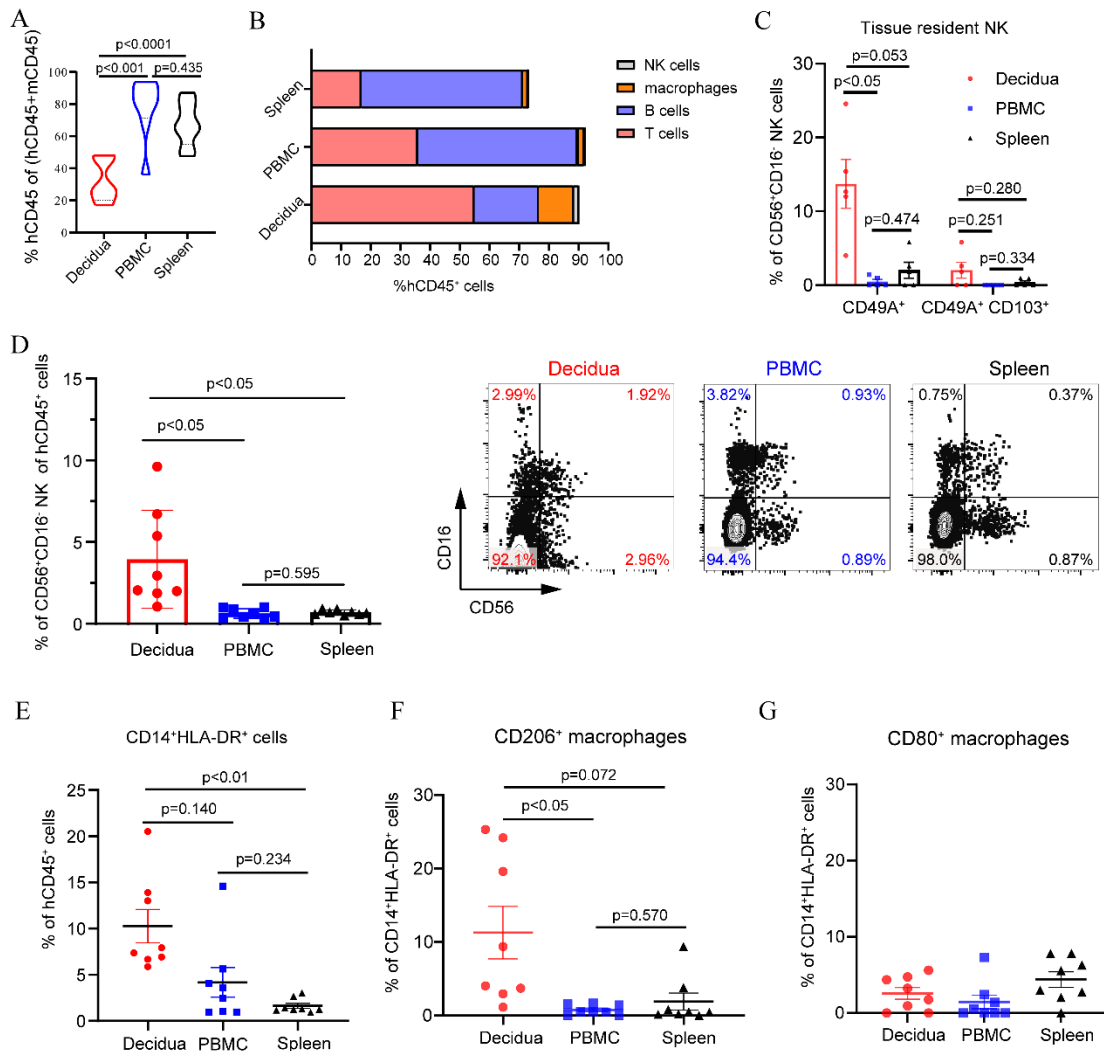

81

82 **Figure S1. Human immune cell reconstitution in pregnant HIS mice made by**  
 83 **mating with NSG males at E14.5. (A-B)** Shown are human lymphohematopoietic  
 84 chimerism (A; mean  $\pm$  SEM) and ratios (B; mean  $\pm$  SEM) of specific immune  
 85 subsets within human CD45<sup>+</sup> cells in MFI, PBMC and spleen of HIS mice (n = 8).  
 86 (C) Percentages (mean  $\pm$  SEM) of CD56<sup>+</sup>CD49a<sup>+</sup> and CD56<sup>+</sup>CD49a<sup>+</sup>CD103<sup>+</sup> cells  
 87 within CD56<sup>+</sup>CD16<sup>+</sup> NK cells. (D) Percentages (left; mean  $\pm$  SEM) and  
 88 representative FCM profiles (right) of CD56<sup>+</sup>CD16<sup>+</sup> NK cells. (E-G) Percentages  
 89 (mean  $\pm$  SEM) of total human macrophages (E), CD206<sup>+</sup> M2 (F) and CD80<sup>+</sup> M1  
 90 (G) macrophages. Statistical differences were determined with one-way ANOVA  
 91 for multiple variable comparisons.

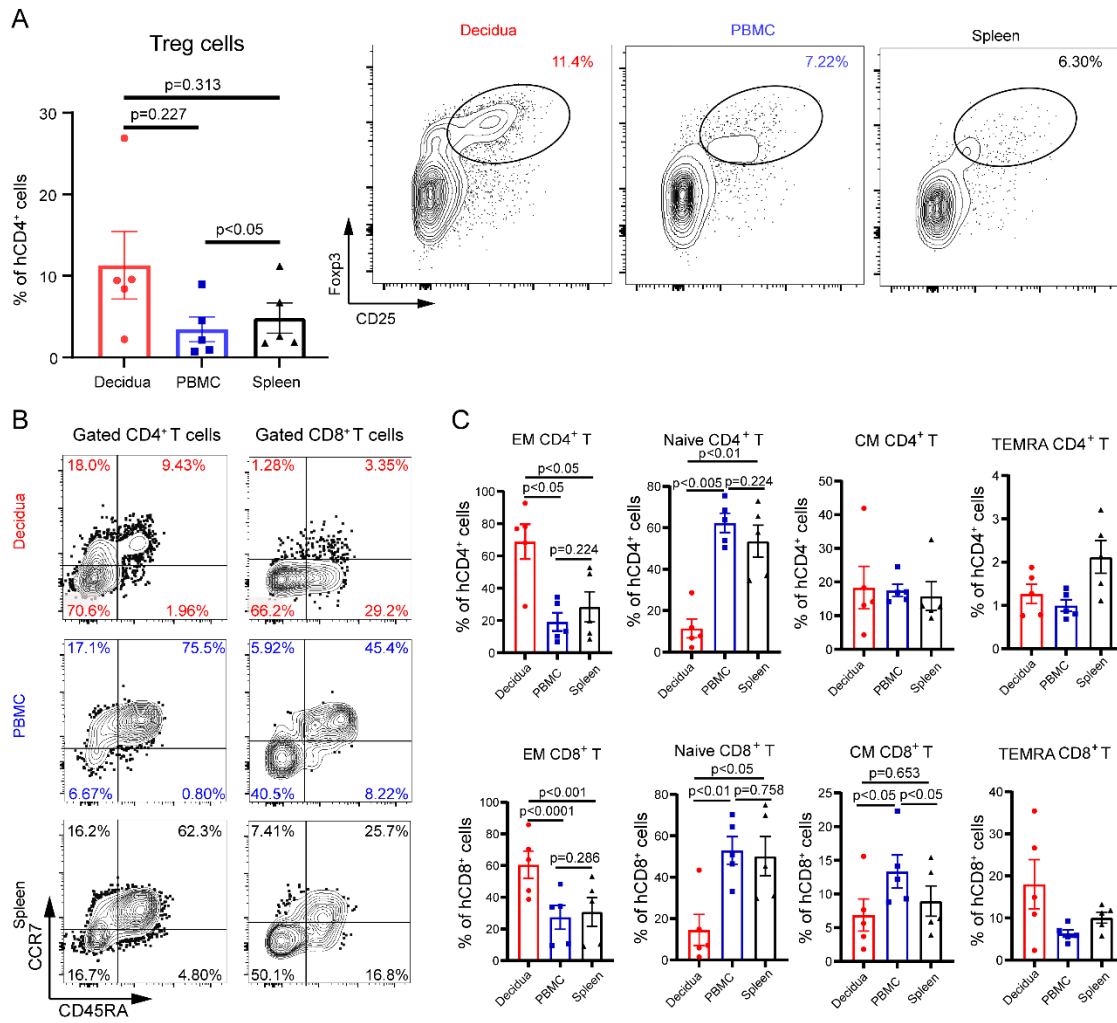

**Figure S2. Characterization of human T cell compartment in pregnant HIS mice that mated with NSG males at E14.5.** (A) Percentages (n=5; mean ± SEM) of human Treg cells within CD4<sup>+</sup> T cells. (B) Representative FCM profiles of CD45RA and CCR7 expression in human CD4<sup>+</sup> and CD8<sup>+</sup> T cells. (C) Summarized results (mean ± SEM; n = 5) of the percentages of EM T cell (CD45RA<sup>-</sup>CCR7<sup>-</sup>), Naive T cell (CD45RA<sup>+</sup>CCR7<sup>+</sup>), TEMRA cell (CD45RA<sup>+</sup>CCR7<sup>-</sup>) and CM T cell (CD45RA<sup>-</sup>CCR7<sup>+</sup>). Statistical differences were determined with one-way ANOVA for multiple variable comparisons.

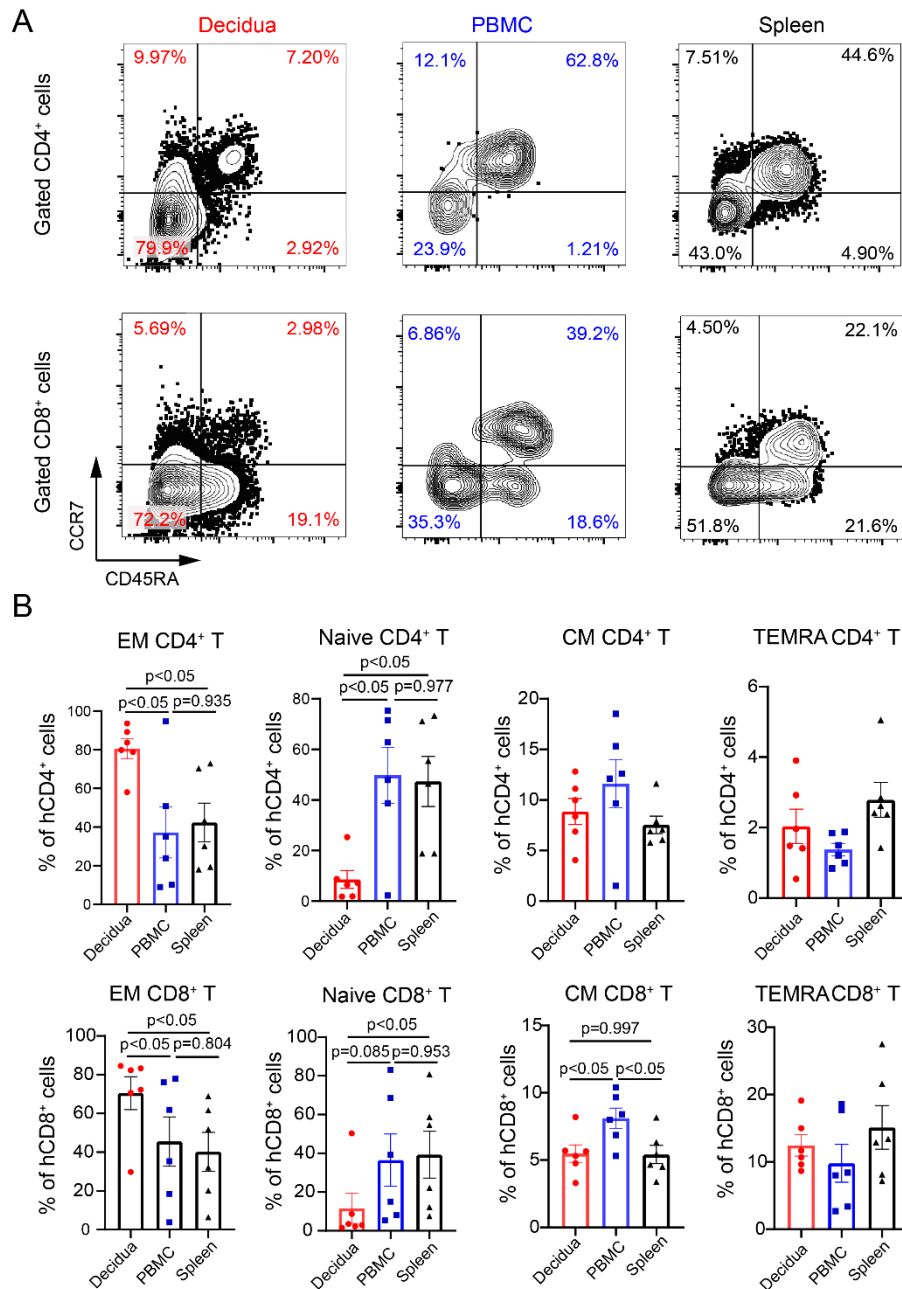

**Figure S3. Determination of human immune subset composition in pregnant HIS mice made by mating with BALB/c male at E14.5.** (A) Representative FCM profiles of CD45RA and CCR7 expression in human CD4<sup>+</sup> and CD8<sup>+</sup> T cells. (B) Summarized results (mean  $\pm$  SEM; n = 6) of the percentages of EM T cell (CD45RA<sup>-</sup>CCR7<sup>-</sup>), Naive T cell (CD45RA<sup>+</sup>CCR7<sup>+</sup>), TEMRA cell (CD45RA<sup>+</sup>CCR7<sup>-</sup>) and CM T cell (CD45RA<sup>-</sup>CCR7<sup>+</sup>). Statistical differences were determined with one-way ANOVA for multiple variable comparisons.

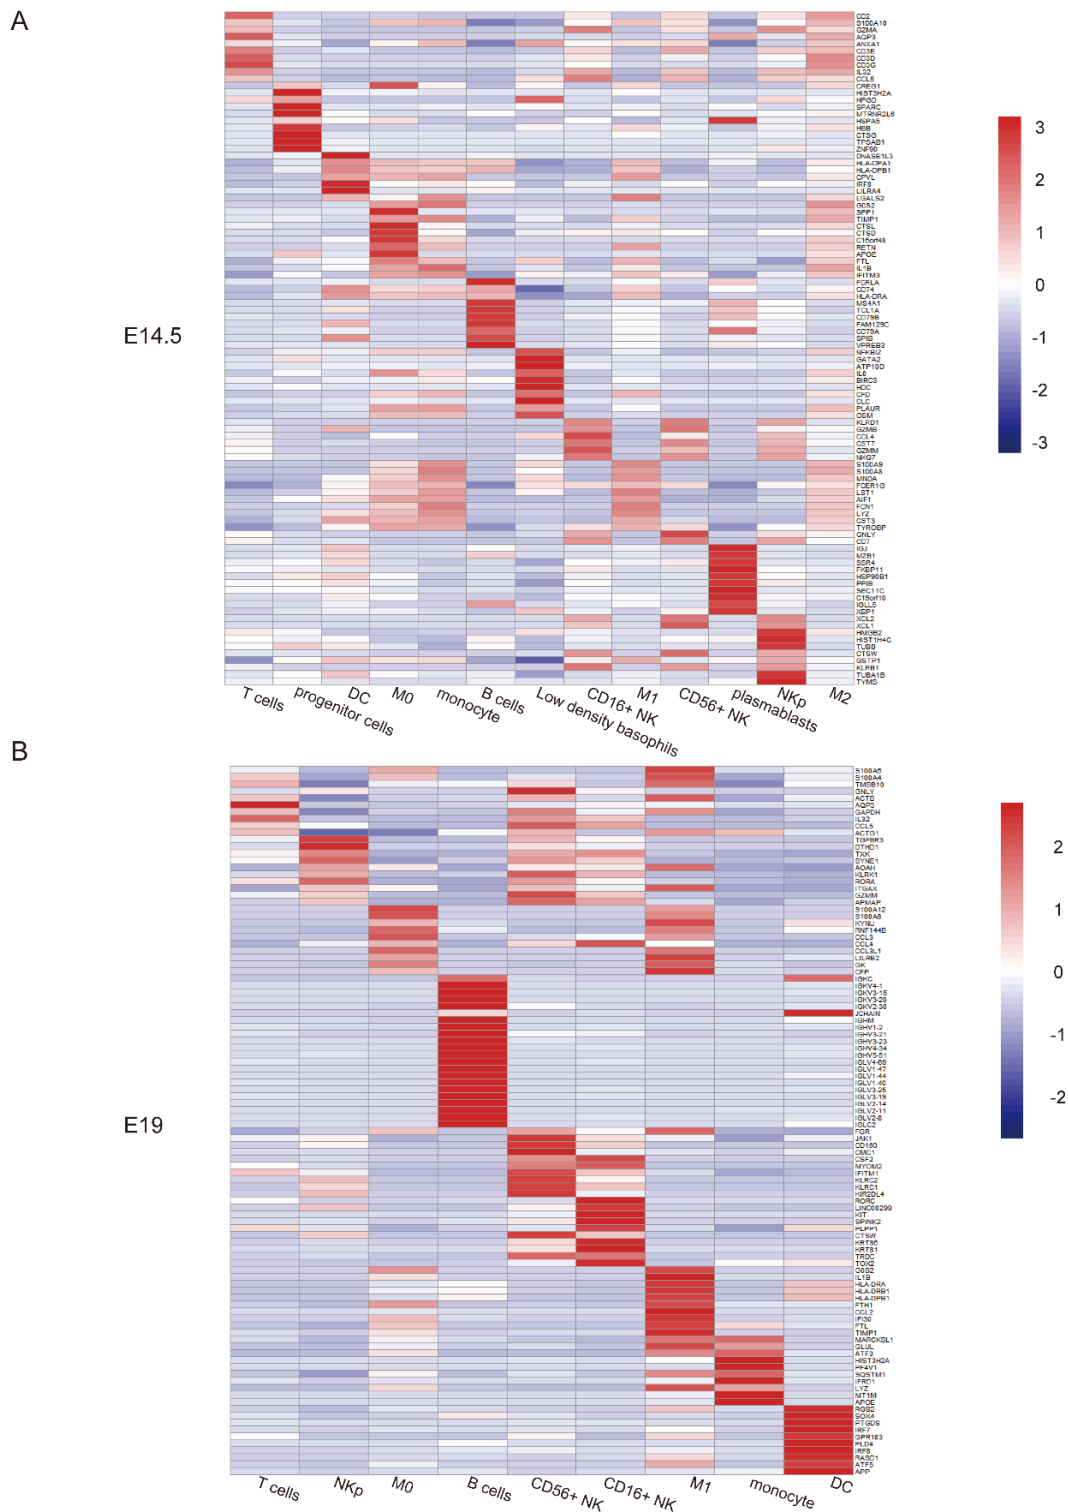

**Figure S4. Heatmap showing expression levels of TOP 10 specific markers in each cell cluster at E14.5 (A) and E19 (B).**

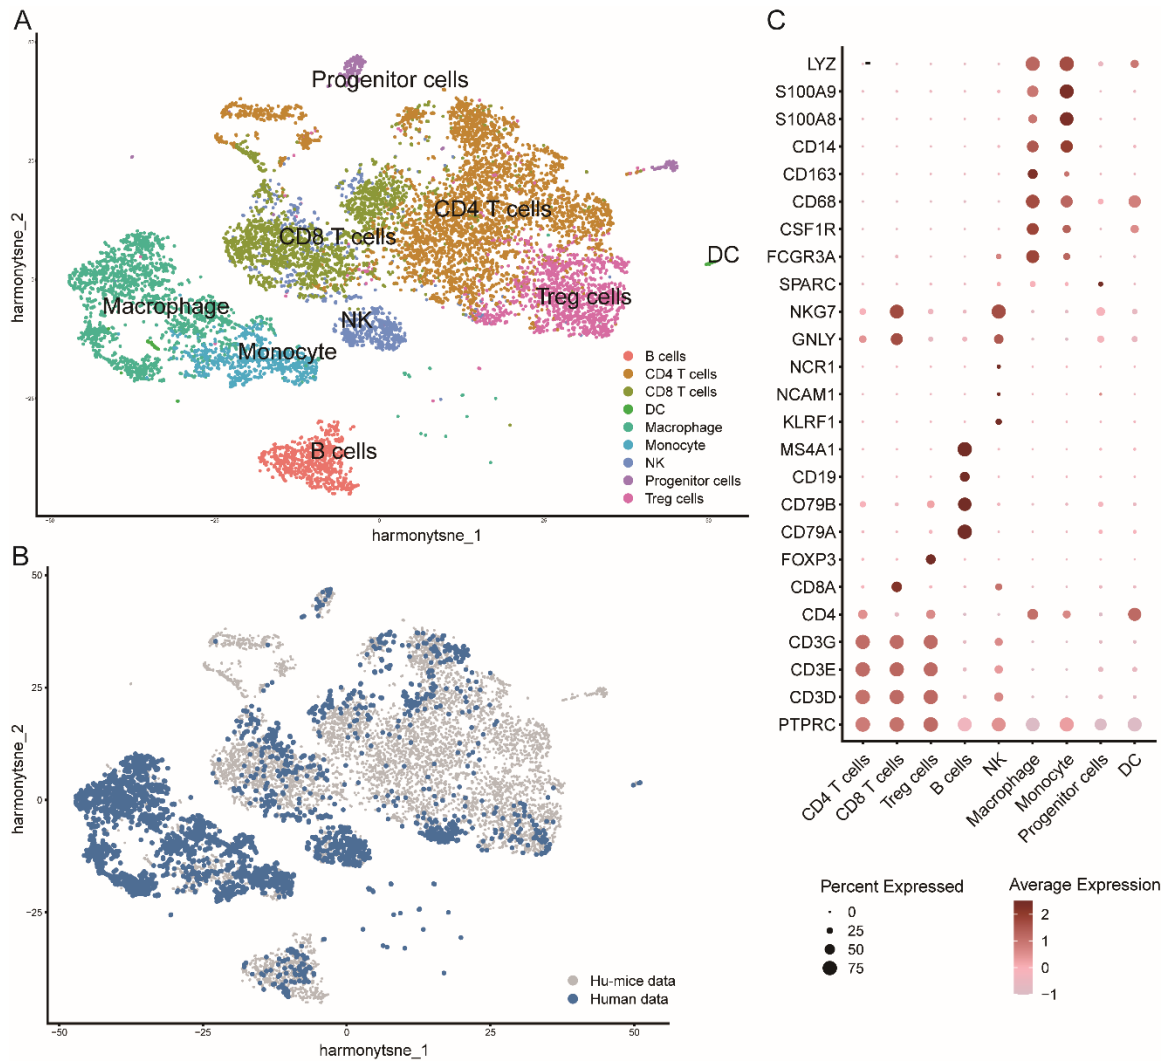

**Figure S5. Integration analysis of human immune cell composition in HIS mouse decidua and the human counterpart. (A) Main immune cell types at the maternal-fetal interface of E14.5 HIS mice and human being (20-34 week). (B) t-SNE plots about the cell origin. (C) Dot plot of main immune cell types.**

A

Cell-cell interaction (spleen E14.5)

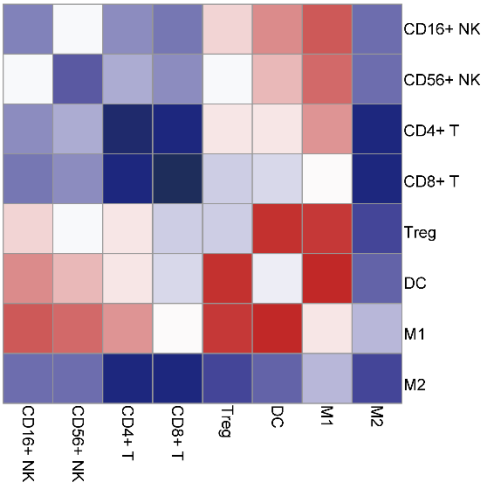

B

Cell-cell interaction (spleen E19)

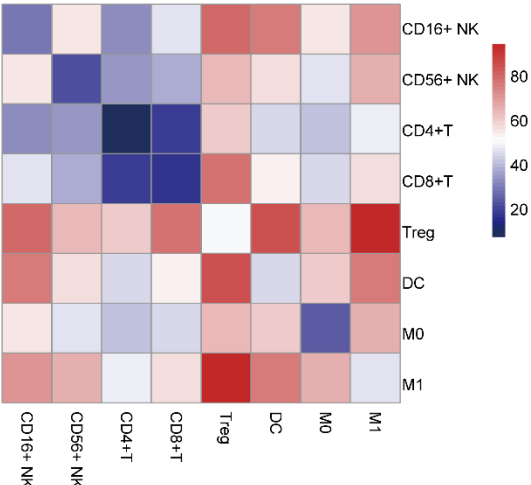

**Figure S6. Cell-cell interactions examination for human immune subsets in spleen at E14.5 (A) and E19 (B).**

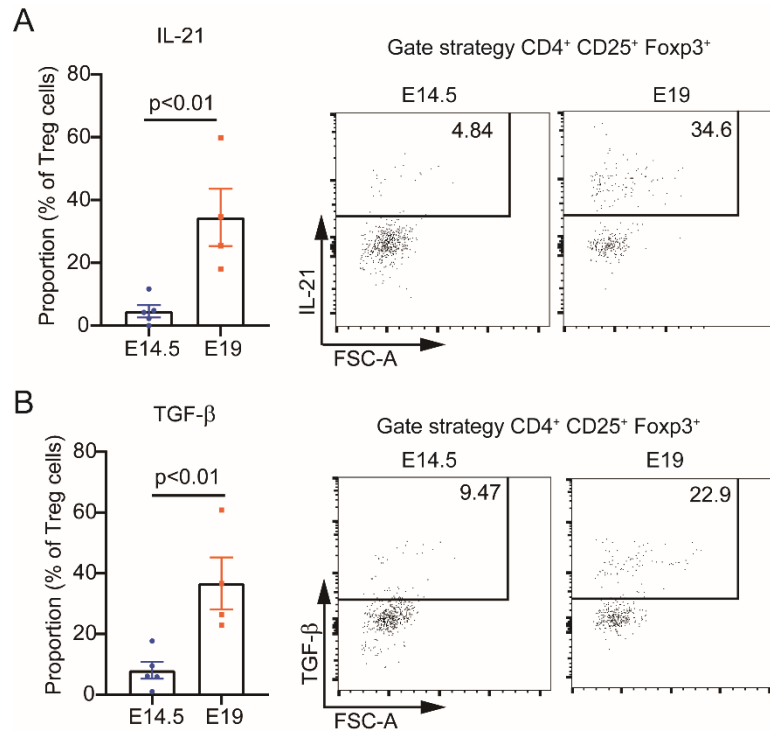

**Figure S7. The protein expression of IL-21 and TGF-β in CD4<sup>+</sup> CD25<sup>+</sup> Foxp3<sup>+</sup> Treg cells.** (A) Ratios (mean ± SEM) of IL-21<sup>+</sup> Treg cells in decidua at E14.5 (n=5) and E19 (n=4). Right side is representative flow cytometric profiles. (B) Ratios (mean ± SEM) of TGF-β<sup>+</sup> Treg cells in decidua at E14.5 (n=5) and E19 (n=4). Right side is representative flow cytometric profiles. Significance was determined by unpaired t-test.

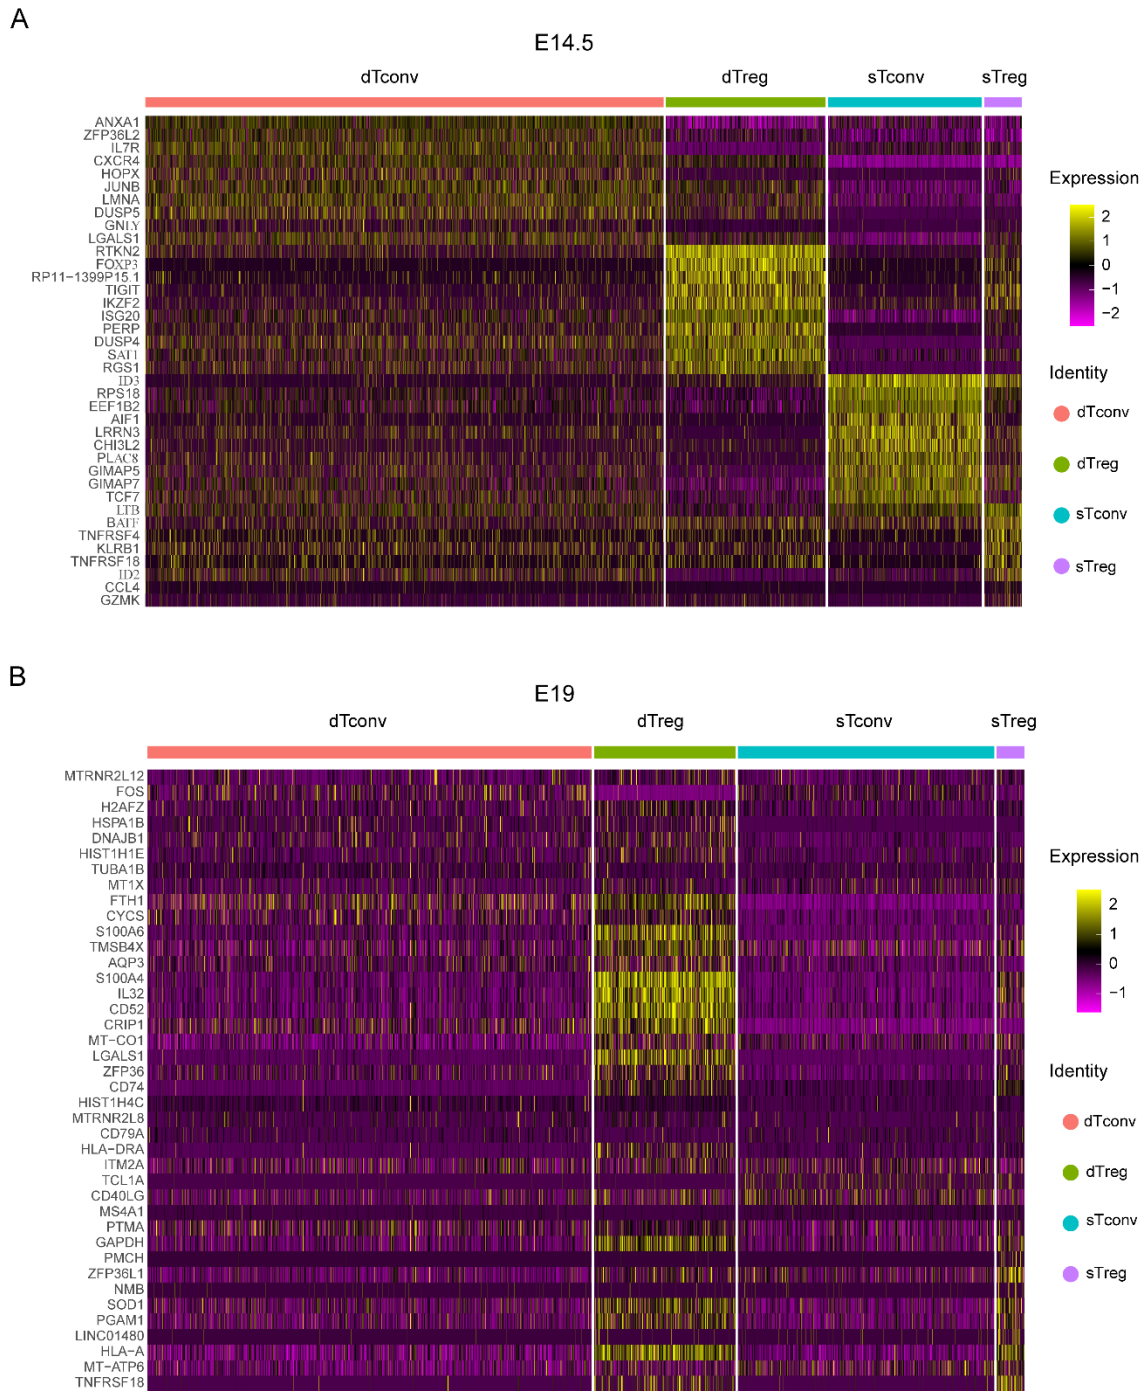

**Figure S8. Heatmaps show the expression levels of top10 markers in Treg cells and Tconv cells of decidua and spleen at E14.5 (A) and E19 (B).**

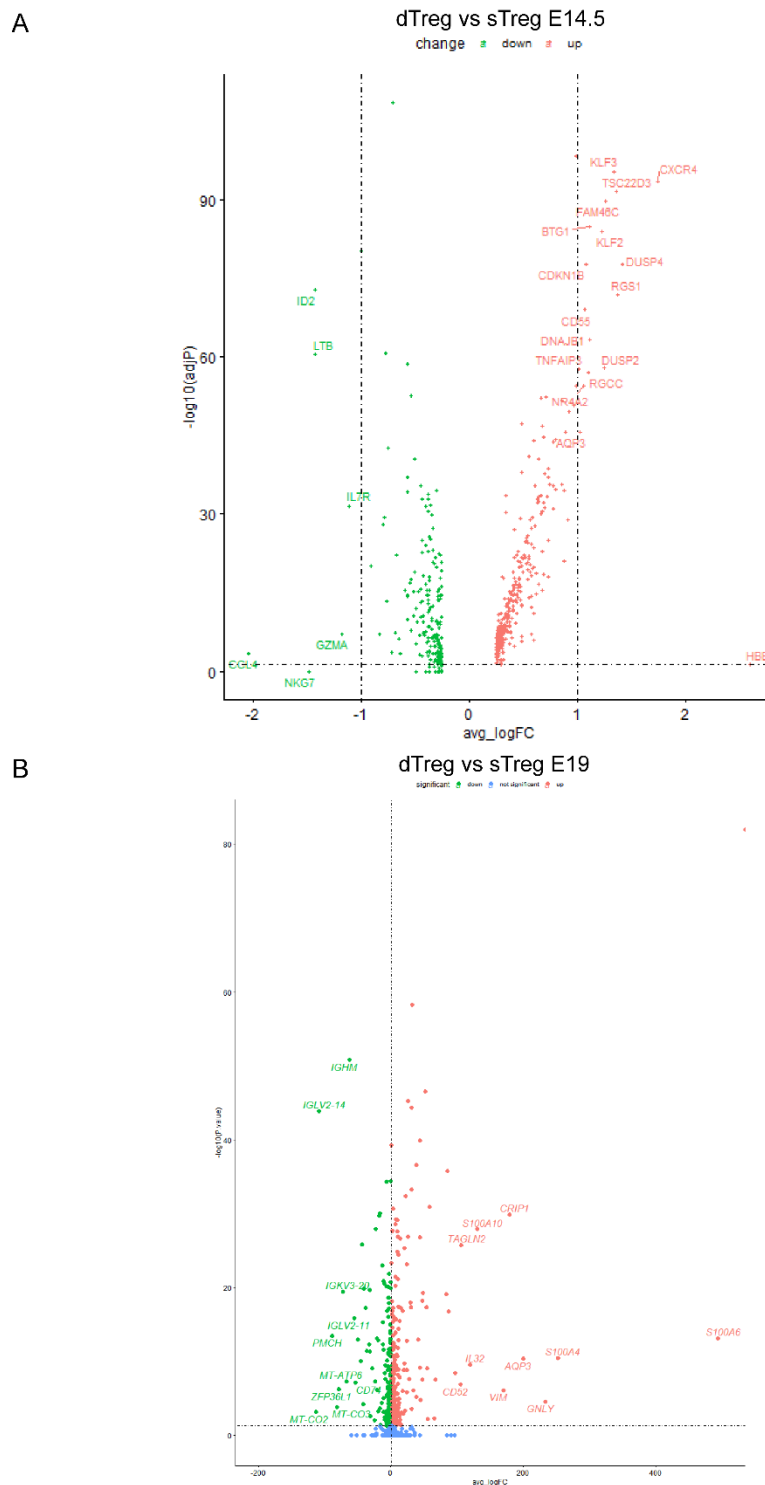

**Figure S9. Volcano plots of differential gene expression between dTreg cells and sTreg cells at E14.5 (A) and E19 (B).**

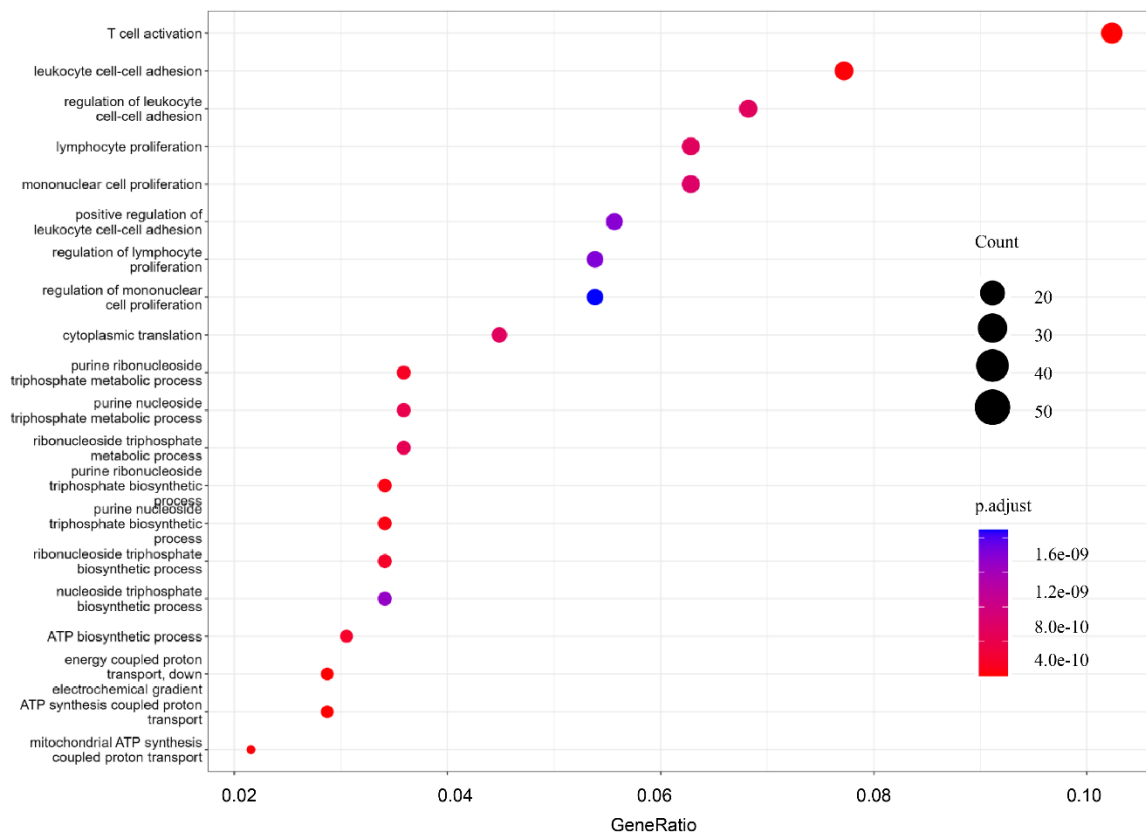

**Figure S10. Gene set enrichment analysis was performed using the GO tool for significantly upregulated genes in dTreg cells at E19 relative to E14.5.**

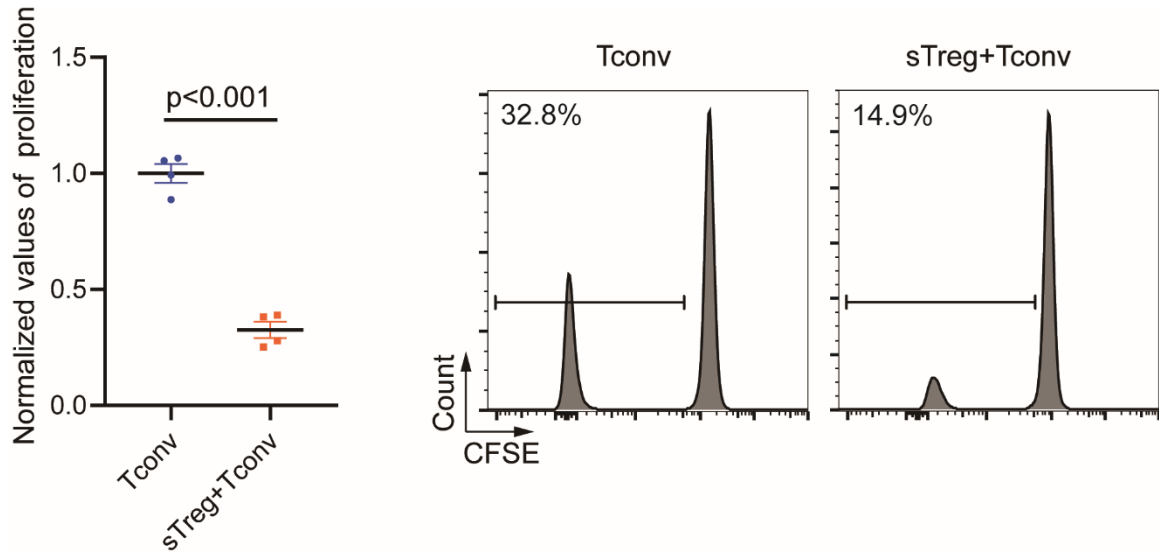

**Figure S11.** Summarized data (left; mean  $\pm$  SEM) of the immune inhibitory effect of human sTreg cells to human sTconv cell proliferation in the presence of 30 Gy irradiated BALB/c splenic cells. Representative FCM profiles (right) of Tconv cell proliferation. Treg : Tconv = 1 : 2, BALB/c stimulator cells : Tconv = 1 : 2. Significance was determined by unpaired t-test.

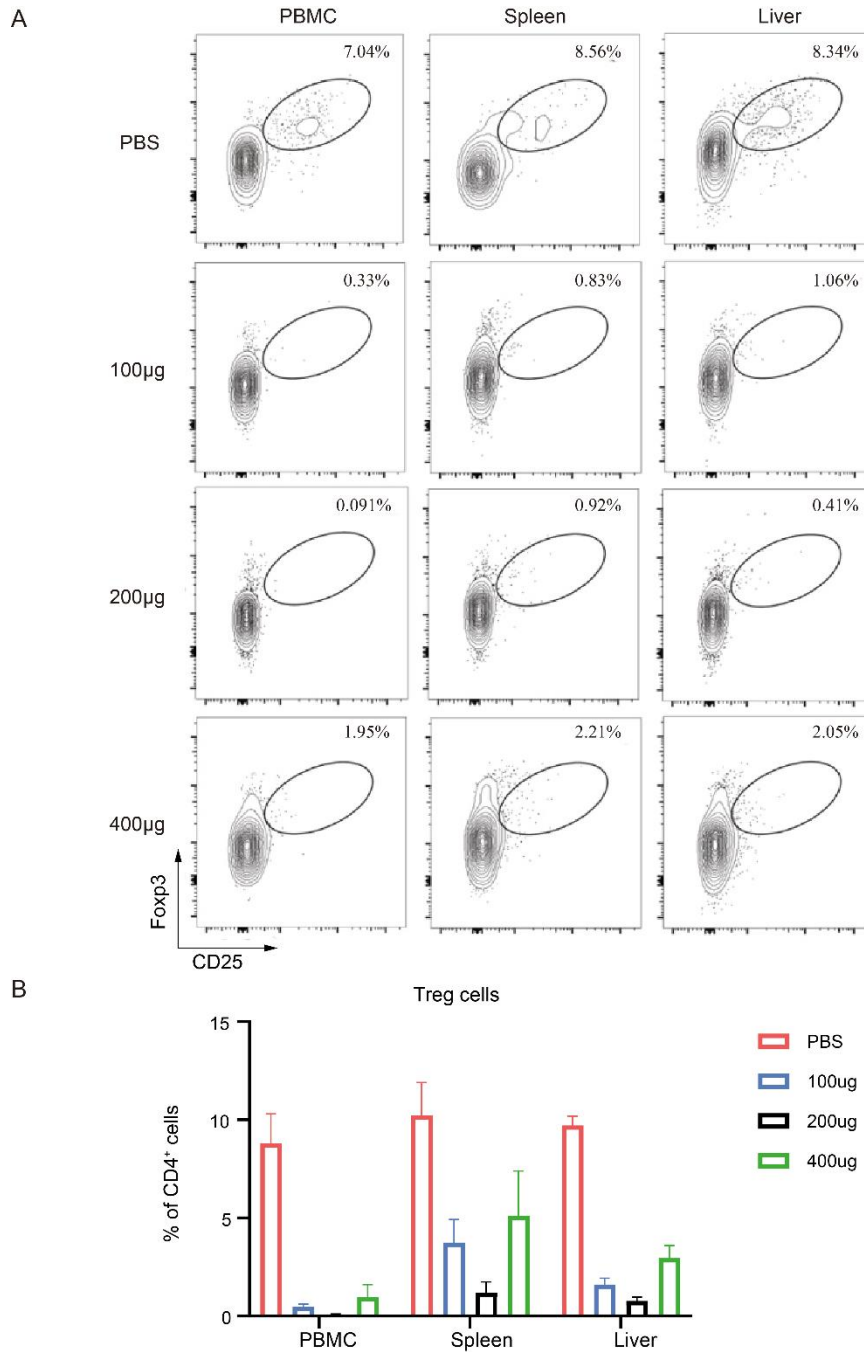

**Figure S12. Dosage tests of anti-CD25 mAb for Treg cell reduction in humanized mice.** Different dosages of anti-CD25 mAb (100 µg or 200 µg or 400 µg) or same volume of PBS was i.p. injected into non-pregnant HIS mice at week 10 after humanization. The mice were euthanized 6 days later for examination. **(A)** Representative FCM profiles and **(B)** percentages (n =3; mean ± SEM) of Treg cells in PBMC, spleen and liver were shown.

153 **Table S1.** (Antibody information for FCM)

| <b>Antibodies</b> | <b>Fluorophore</b> | <b>Company</b> | <b>Catalog number</b> |
|-------------------|--------------------|----------------|-----------------------|
| Anti-human CD45   | APC/Cy7            | Biolegend      | 304014                |
| Anti-human CD3    | PE/Cy7             | BD             | 557851                |
| Anti-human CD4    | PE                 | Biolegend      | 300508                |
| Anti-human CD4    | FITC               | eBioscience    | 11-0048-42            |
| Anti-human CD8    | BV605              | BD             | 564116                |
| Anti-human CD45RA | FITC               | BD             | 555488                |
| Anti-human CCR7   | APC                | Biolegend      | 353214                |
| Anti-human CD25   | PE                 | Biolegend      | 356134                |
| Anti-human Foxp3  | PE/Cy5             | eBioscience    | 15-4776-42            |
| Anti-human CD19   | APC                | Biolegend      | 302212                |
| Anti-human CD20   | PE/Cy7             | Biolegend      | 302312                |
| Anti-human CD33   | BV421              | Biolegend      | 303416                |
| Anti-human CD14   | FITC               | Biolegend      | 301804                |
| Anti-human HLA-DR | PE/Cy7             | Biolegend      | 307616                |

|                           |               |           |        |
|---------------------------|---------------|-----------|--------|
| Anti-human CD80           | BV605         | BD        | 563315 |
| Anti-human CD206          | AF700         | Biolegend | 321132 |
| Anti-human CD56           | FITC          | Biolegend | 318304 |
| Anti-human CD16           | Percp/Cy5.5   | Biolegend | 302028 |
| Anti-human CD49a          | AF647         | Biolegend | 328310 |
| Anti-human CD103          | PE            | BD        | 550260 |
| Anti-mouse CD45           | Pacific Blue  | Biolegend | 103126 |
| Anti-human Helios         | PE/Cy7        | Biolegend | 137236 |
| Anti-human IL-21          | PE            | BD        | 560463 |
| Anti-human TGF- $\beta$ 1 | FITC          | Biolegend | 349606 |
| Anti-mouse Ter119         | PE/Dazzle 594 | Biolegend | 116244 |

154

155 **Table S2.** (Antibody information for IHC).

| Antibody        | Company  | Catalog number |
|-----------------|----------|----------------|
| Anti-human CD45 | DAKO     | M070101        |
| Anti-human CD4  | ABclonal | A10787         |

156

157

158 **REFERENCES**

- 159 1. Novershtern N, et al. Densely interconnected transcriptional circuits control cell states  
160 in human hematopoiesis. *Cell*. 2011;144(2):296-309.
- 161 2. Monaco G, et al. RNA-Seq Signatures Normalized by mRNA Abundance Allow Absolute  
162 Deconvolution of Human Immune Cell Types. *Cell Rep*. 2019;26(6): 1627-1640.
- 163 3. Schmiedel BJ, et al. Impact of Genetic Polymorphisms on Human Immune Cell Gene  
164 Expression. *Cell*. 2018;175(6): 1701-1705.
- 165 4. Yu G, et al. clusterProfiler: an R package for comparing biological themes among gene  
166 clusters. *OMICS*. 2012;16(5):284-287.
- 167 5. Efremova M, et al. CellPhoneDB: inferring cell-cell communication from combined  
168 expression of multi-subunit ligand-receptor complexes. *Nat Protoc*. 2020;15(4):1484-  
169 1506.

170
